# Supplementary material for: Functionalization of ZnO nanorods by CuO nanospikes for gas sensor applications
Source: Royal Society of Chemistry journal article supplement (doi:10.1039/c4ra00078a), 2014-01-01

## Supplementary Information

# Functionalization of ZnO nanorods through CuO nanospikes for gas sensor applications

*Prabhakar Rai<sup>1,2</sup>, Seung-Ho Jeon<sup>1</sup>, Chung-Hyun Lee<sup>1</sup>, Jong-Heun Lee,<sup>2</sup> Yeon-Tae Yu<sup>1\*</sup>*

<sup>1</sup>Division of Advanced Materials Engineering and Research Centre for Advanced Materials Development, College of Engineering, Chonbuk National University, Jeonju 561-756,

South Korea

<sup>2</sup>Department of Materials Science and Engineering, Korea University, Seoul 136-713, South Korea

\*Corresponding Author: Y. T. Yu (E-Mail: yeontae@jbnu.ac.kr, Tel: +82-63-270-2288, Fax: +82-63-270-2305)

**Fig. S1** In-lens mode FESEM images of CuO/ZnO NRs.

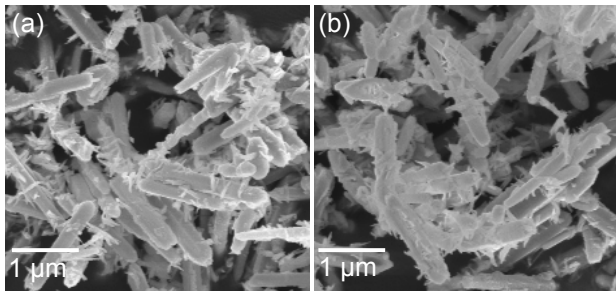

Supplement: c4ra00078a1.pdf [file c4ra00078a1.pdf]
